# Supplementary material for: Changes in the pattern of suicides and suicide attempt admissions in relation to the COVID-19 pandemic
Source: Springer Nature journal article supplement (doi:10.1007/s00406-022-01448-y), 2022-07-04

Suicide attempts per 100,000 inhabitants by gender and age group - March-December 2019

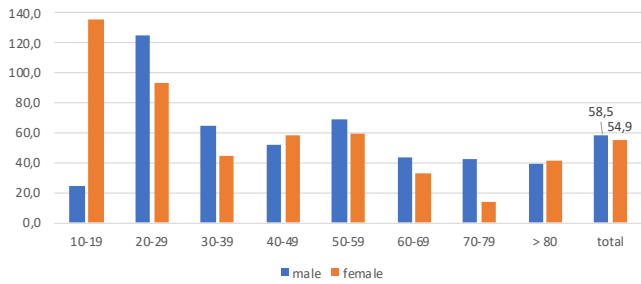

Suicide attempts per 100,000 inhabitants by gender and age group - March-December 2020

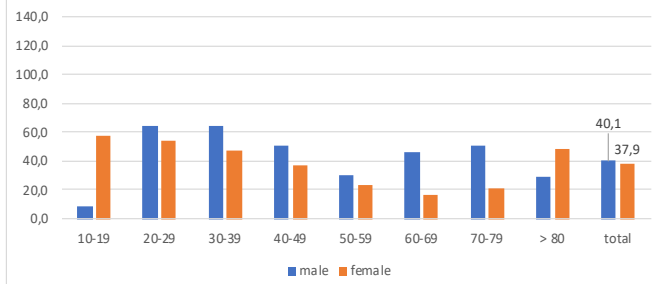

Completed Suicides per 100,000 inhabitants by gender and age group - March-December 2019

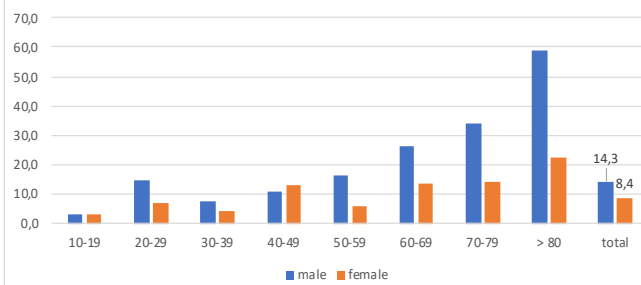

Completed suicides per 100,000 inhabitants by gender and age group - March-December 2020

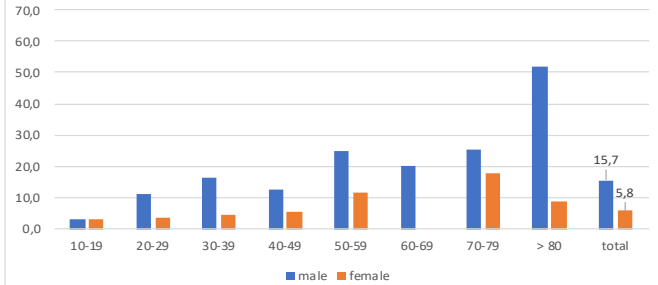

Supplement: MOESM2 [file 406_2022_1448_MOESM2_ESM.pdf]
