# Supplementary material for: Changes in the pattern of suicides and suicide attempt admissions in relation to the COVID-19 pandemic
Source: Springer Nature journal article supplement (doi:10.1007/s00406-022-01448-y), 2022-07-04

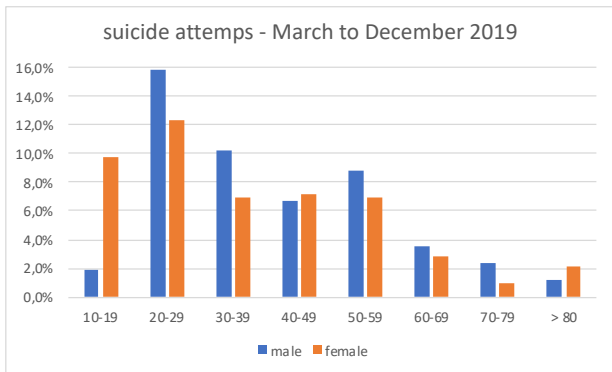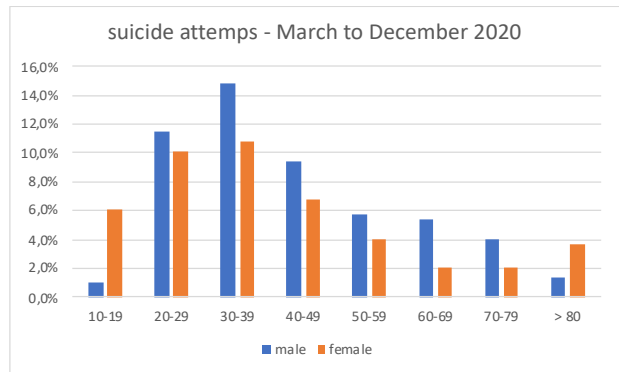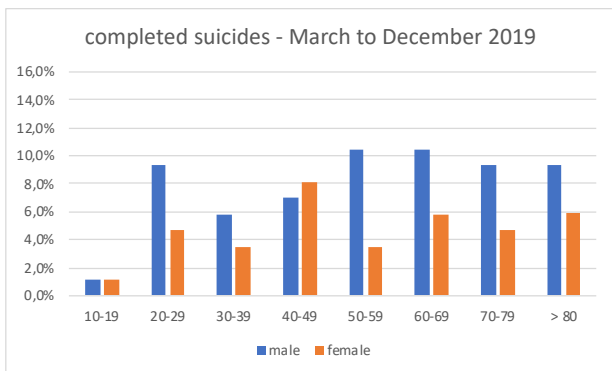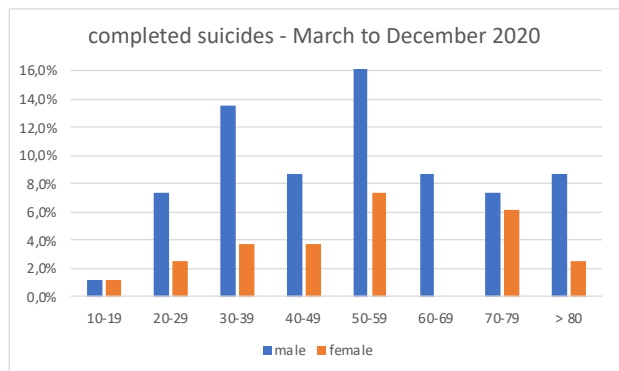

Supplement: MOESM4 [file 406_2022_1448_MOESM4_ESM.pdf]
